# Supplementary material for: The role of synthesis vis-à-vis the oxygen vacancies of Co3O4 in the oxygen evolution reaction
Source: Royal Society of Chemistry journal article supplement (doi:10.1039/d2nj00219a), 2022-01-01
Supplement: d2nj00219a1.pdf [file d2nj00219a1.pdf]

## **The role of synthesis vis-à-vis oxygen vacancies of $\text{Co}_3\text{O}_4$ in oxygen evolution reaction**

**Saraswati Roy<sup>1</sup>, Nayana Devaraj<sup>2</sup>, Kartick Tarafder<sup>2</sup>, Chanchal Chakraborty<sup>1,3</sup>,  
Sounak Roy<sup>1,3\*</sup>**

*<sup>1</sup>Department of Chemistry, Birla Institute of Technology and Science Pilani, Hyderabad Campus, Hyderabad – 500078, India*

*<sup>2</sup>Department of Physics, National Institute of Technology Karnataka, Mangalore-575025, India*

*<sup>3</sup>Materials Center for Sustainable Energy & Environment, Birla Institute of Technology and Science Pilani, Hyderabad Campus, Hyderabad – 500078, India*

\*Corresponding Author

Email: [sounak.roy@hyderabad.bits-pilani.ac.in](mailto:sounak.roy@hyderabad.bits-pilani.ac.in)

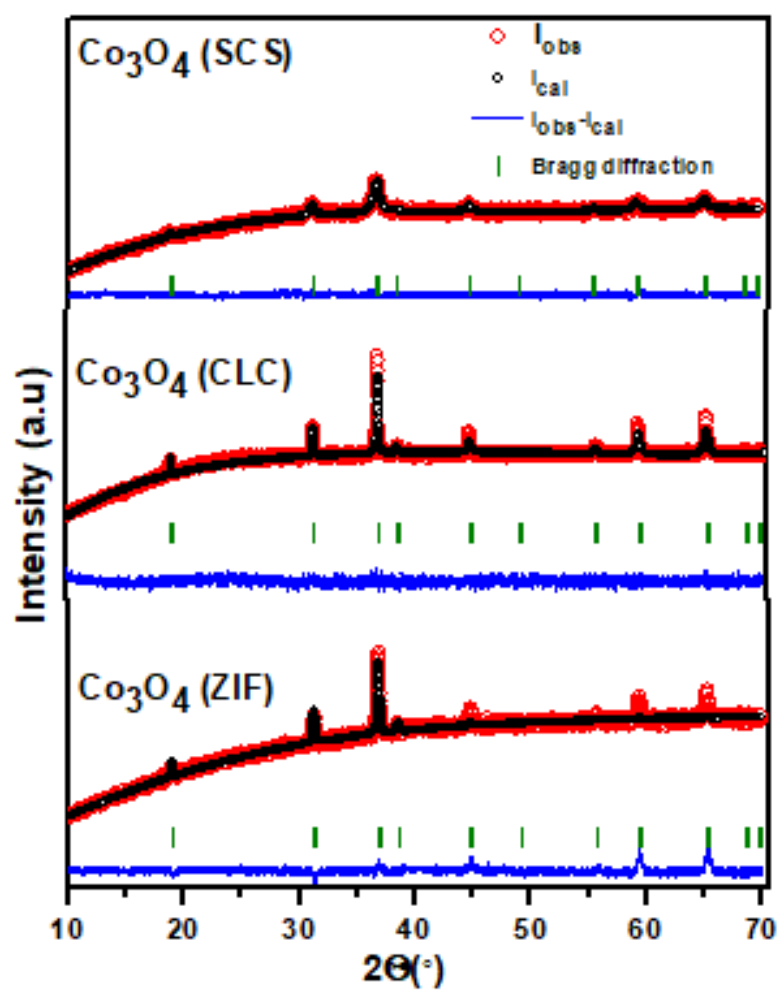

**Fig. S1** Rietveld refinement of the three Co-oxides

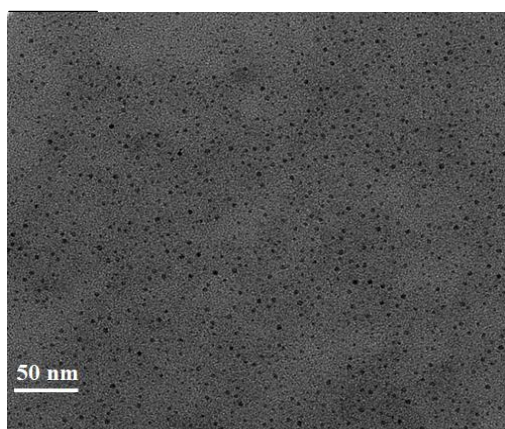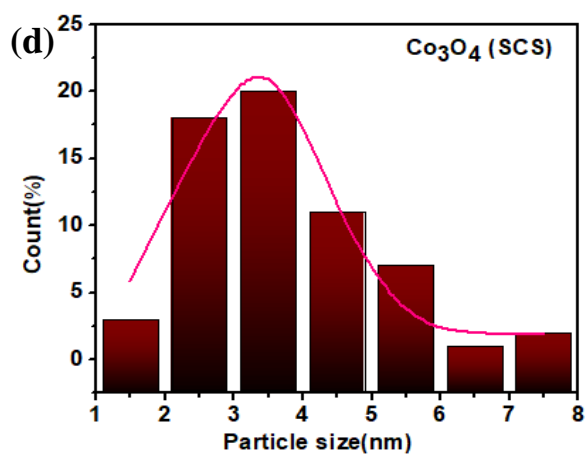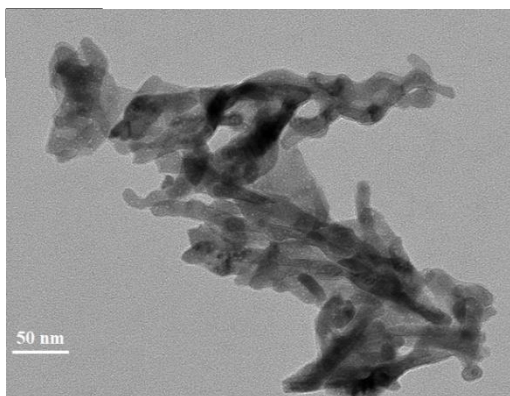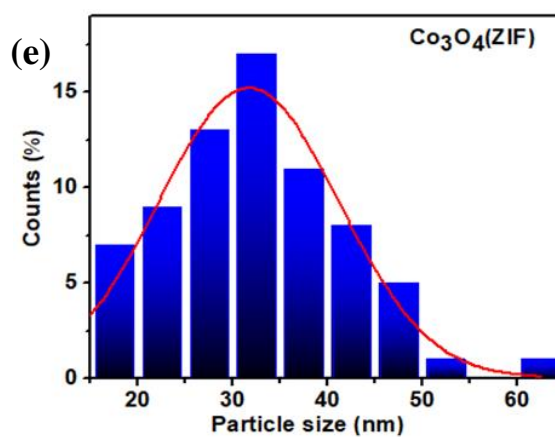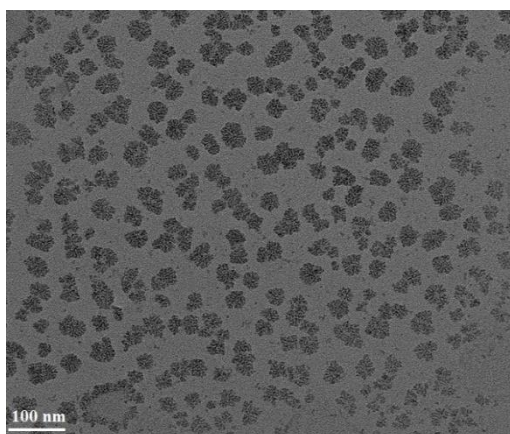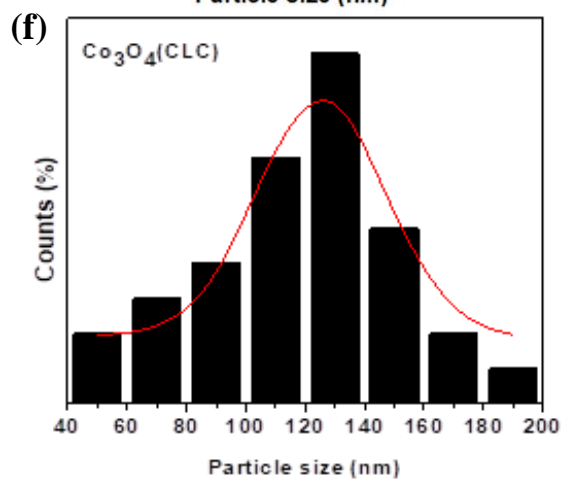

**Fig. S2** HR-TEM image of  $\text{Co}_3\text{O}_4$ (SCS) (a),  $\text{Co}_3\text{O}_4$ (ZIF) (b),  $\text{Co}_3\text{O}_4$ (CLC) (c), corresponding particle size distribution plot of  $\text{Co}_3\text{O}_4$ (SCS) (d),  $\text{Co}_3\text{O}_4$ (ZIF) (e),  $\text{Co}_3\text{O}_4$ (CLC) (f).

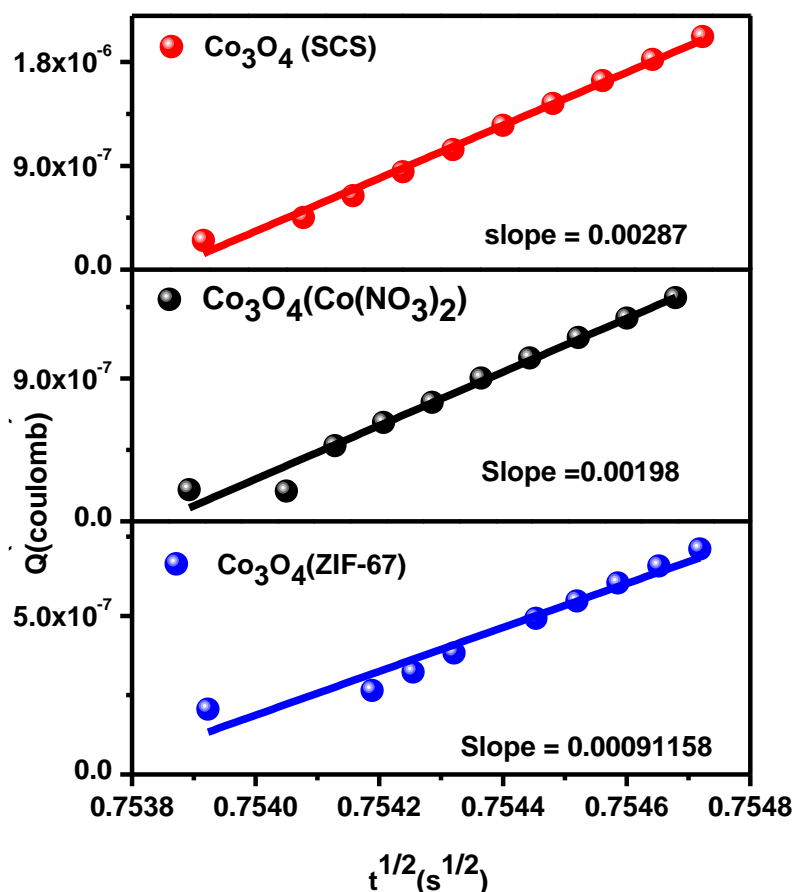

**Fig. S3** The electrochemical active surface area (ECSA) of the three of the three Co-oxide.

**Calculation of electrochemical active surface areas (ECSA):**

The ECSA was measured using chronoamperometry fast study which was carried out in the presence of 0.01 M potassium ferricyanide and 0.1 M KCl as an electrolyte. Finally, the ESCA was calculated using the Cottrell equation:

$$Q = 2nFAD^{1/2} C_0 t^{1/2} \pi^{-1/2}$$

Where  $Q$  = Charge in coulombs

$n$  = Number of electrons being transferred

$F$  = Faraday constant (96,485 C/mol)

$A$  = ECSA (cm<sup>2</sup>)

$D$  = Diffusion coefficient for  $\text{K}_3[\text{Fe}(\text{CN})_6]$  ( $7.6 \times 10^{-6}$  cm<sup>2</sup> /s)

$C_0$  = Concentration of  $\text{K}_3[\text{Fe}(\text{CN})_6]$  (mol/cm<sup>3</sup>)

$t$  = time (s)

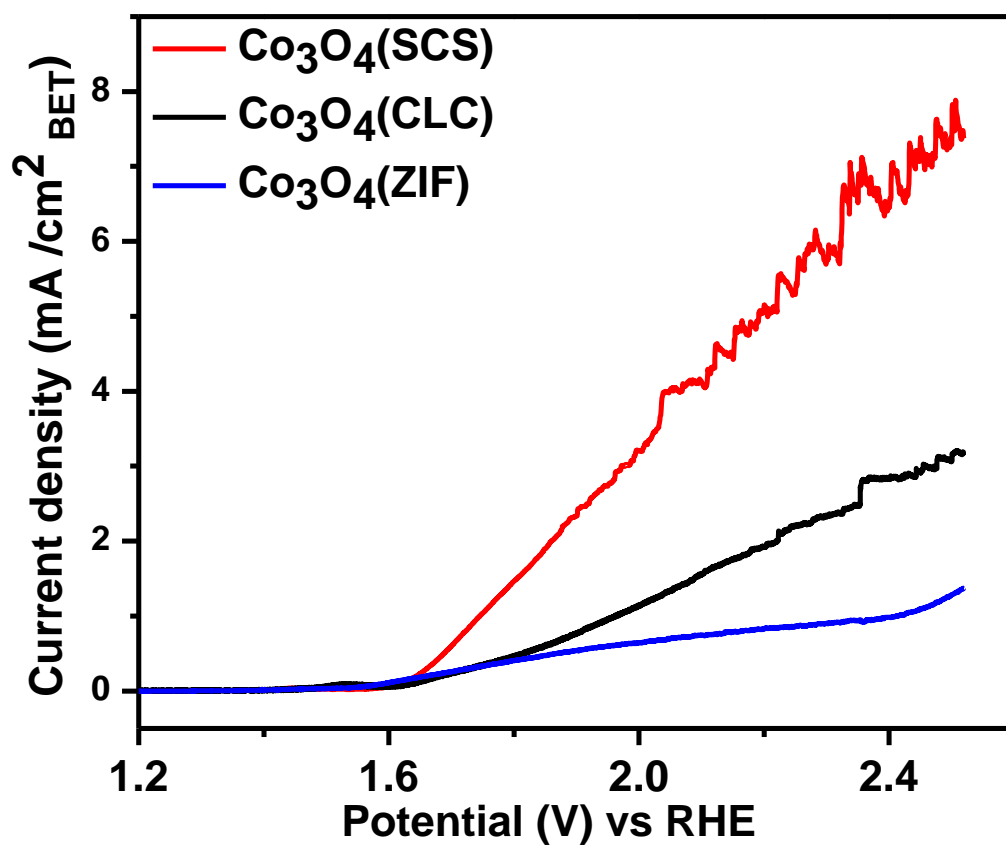

**Fig. S4** LSV plot of the three Co-oxides normalized with BET surface area.
